# Supplementary material for: First characterisation of rotational conformers in a chiral nitroxide by EPR spectroscopyElectronic supplementary data (ESI) available: preparation and spectroscopic characterization of 3a, Arrhenius plot for the rotation of the N–Cα bond in 3b.
Source: Royal Society of Chemistry journal article supplement (doi:10.1039/b200323f), 2002-02-15
Supplement: b200323f.doc [file b200323f.doc]

# Supplementary data

*Chem. Commun.*

First characterisation of rotational conformers in a chiral nitroxide by EPR spectroscopy

*Paola Franchi, Marco Lucarini, Gian Franco Pedulli,and Elisa Bandini*

*Synthesis of the amide* ***1***. (R)--methoxy--(trifluoromethyl)phenylacetyl chloride (Aldrich) (1 mmol) was added dropwise to a solution of *tert*-butylamine (2 mmol) in toluene (15 ml) over a period of 30 min. The reaction mixture was heated under reflux for 3 h, then Et2O (20 ml) was added and the organic phase was washed with neutral, acid, basic and finally neutral H2O (20 ml x 4). The combined organic extracts were dried (Na2SO4) and concentrated under reduced pressure to give the amide **1** (98% yield) as a white solid. 1H NMR (400 MHz, CDCl3) ** 1.37 (s, 9H), 3.40 (s, 3H), 6.54 (s, 1H), 7.37-7.43 (m, 3H), 7.49-7.55 (m, 2H); 13C NMR (100 MHz, CDCl3) **26.7**51.8, 55.1, 84,1 (q, C-CF3, *J* = 31 Hz), 124.1 (q, CF3, *J* = 287 Hz), 127.8, 128.7, 129.6, 133.2, 165.5. MS (EI): *m/z* 289 ([M]+, 3%), 274, (8%), 246 (40 %), 189 (100 %), 57 (33 %).

*Synthesis of the amine* ***3a***. The amide **1** (1 mmol) was dissolved in anhydrous THF (8 ml) and added dropwise to a suspension of LiAlH4 (3.5 mmol) in anhydrous THF (10 ml) over a period of 30 min under Ar. The reaction mixture was stirred and heated under gentle reflux. After 6 h an extra portion of LiAlH4 (3.8 mmol) was added and the reaction mixture was heated under reflux for a further 13 h, before being cooled and treated with ethyl acetate (8 ml) and H2O (10 ml). The thick suspension of Al(OH)3 was filtered and the organic phase was extracted with Et2O (3 x 10 ml), before being dried (Na2SO4). The solvent was removed by evaporation under reduced pressure and the remaining oily extract was treated with 3 N HCl (5 ml). The acid aqueous phase was washed with Et2O (3 x 5 ml) before being added with NaHCO3 and 2 M NaOH until pH 8-9. The basic acqueous phase was further extracted with Et2O (3 x 10 ml). The combined organic extracts were dried (Na2SO4), filtered and concentrated, to afford the amine **3a** (30% yield) as a pale yellow oil. 1H NMR (300 MHz, CDCl3) ** 1.06 (s, 9H), 1.48 (s, 3H), 2.66 (d, 1H, *J*= 11.7 Hz), 2.99 (d, 1H, *J*= 11.7 Hz), 4.5 (broad s, 1H), 7.22-7.27 (m, 1Hp), 7.33-7.38 (m, 2Hm), 7.44-7.48 (m, 2Ho); 13C NMR (75 MHz, CDCl3) **28.4, 29.2, 50.0, 53.2, 71.9, 125.0, 126.4, 128.2, 147.3. MS (ES): *m/z* 208 ([MH]+, 100%). MS (EI): *m/z* 207 ([M]+, <0.5%), 192, ([M-CH3]+, 2%), 174 ([M-CH3-H2O]+, 20 %), 86 ([(CH3)3CN(H)CH2]+, 100 %), 57 (25 %). –4.10 (*c* 1.27 in CHCl3).

Figure 1S. Arrhenius plot for the rotation of the N-C bond in **3b**.

0.6

0.7

0.8

0.9

1.0

7

8

9

1000/(2.3RT)

Log (*k* /s-1)
